# Supplementary material for: Benzodiazepine receptor agonist deprescribing principles for long-term use and dependence: modified Delphi recommendations from a multi-disciplinary expert panel
Source: Ther Adv Psychopharmacol. 2026 Jun 9;16:20451253261457547. doi: 10.1177/20451253261457547 (PMC13254137; doi:10.1177/20451253261457547)
Supplement: sj-xlsx-4-tpp-10.1177_20451253261457547 – Supplemental material for Benzodiazepine receptor agonist deprescribing principles for long-term use and dependence: modified Delphi recommendations from a multi-disciplinary expert panel [file sj-xlsx-4-tpp-10.1177_20451253261457547.xlsx]

## Sheet: BIC-ABBP Phase 3 Likert Scale S
External Reference (Confidential Respondent Number)	Q1	Q1 - Likert Numeric	Q2	Q2 - Likert Numeric	Q3	Q3 - Likert Numeric	Q4	Q4 - Likert Numeric	Q5	Q5 - Likert Numeric	Q6	Q6 - Likert Numeric	Q7	Q7 - Likert Numeric	Q8	Q8 - Likert Numeric	Q9	Q9 - Likert Numeric	Q10	Q10 - Likert Numeric
	Recommendation 1	Recommendation 1	Recommendation 2	Recommendation 2	Recommendation 3	Recommendation 3	Recommendation 4	Recommendation 4	Recommendation 5	Recommendation 5	Recommendation 6	Recommendation 6	Recommendation 7	Recommendation 7	Recommendation 8	Recommendation 8	Recommendation 9	Recommendation 9	Recommendation 10	Recommendation 10
9	Strongly agree	5	Strongly agree	5	Strongly agree	5	Strongly agree	5	Somewhat agree	4	Strongly agree	5	Strongly agree	5	Somewhat agree	4	Strongly agree	5	Strongly agree	5
5	Strongly agree	5	Strongly agree	5	Strongly agree	5	Strongly agree	5	Strongly agree	5	Strongly agree	5	Strongly agree	5	Strongly agree	5	Strongly agree	5	Strongly agree	5
43	Strongly agree	5	Strongly agree	5	Strongly agree	5	Strongly agree	5	Strongly Disagree	1	Strongly agree	5	Strongly agree	5	Strongly agree	5	Strongly agree	5	Strongly agree	5
11	Strongly Disagree	1	Strongly agree	5	Strongly agree	5	Strongly agree	5	Somewhat agree	4	Somewhat agree	4	Strongly agree	5	Neither agree nor disagree	3	Strongly agree	5	Strongly agree	5
6	Strongly agree	5	Strongly agree	5	Strongly agree	5	Strongly agree	5	Strongly agree	5	Strongly agree	5	Strongly agree	5	Strongly agree	5	Somewhat agree	4	Strongly agree	5
39	Strongly agree	5	Strongly agree	5	Neither agree nor disagree	3	Somewhat agree	4	Neither agree nor disagree	3	Somewhat agree	4	Somewhat agree	4	Strongly agree	5	Strongly agree	5	Neither agree nor disagree	3
10	Strongly agree	5	Somewhat agree	4	Strongly agree	5	Strongly agree	5	Strongly agree	5	Strongly agree	5	Strongly agree	5	Strongly agree	5	Somewhat agree	4	Strongly agree	5
3	Strongly agree	5	Strongly agree	5	Strongly agree	5	Strongly agree	5	Somewhat disagree	2	Strongly agree	5	Somewhat agree	4	Strongly agree	5	Strongly agree	5	Somewhat agree	4
14	Strongly agree	5	Somewhat disagree	2	Strongly agree	5	Somewhat disagree	2	Neither agree nor disagree	3	Neither agree nor disagree	3	Neither agree nor disagree	3	Somewhat agree	4	Somewhat agree	4	Neither agree nor disagree	3
4	Strongly agree	5	Strongly agree	5	Strongly agree	5	Strongly agree	5	Strongly agree	5	Strongly agree	5	Strongly agree	5	Somewhat agree	4	Strongly agree	5	Strongly agree	5
8	Strongly agree	5	Strongly agree	5	Strongly agree	5	Strongly agree	5	Somewhat agree	4	Strongly agree	5	Strongly agree	5	Strongly agree	5	Strongly agree	5	Somewhat agree	4
40	Strongly agree	5	Strongly agree	5	Strongly agree	5	Strongly agree	5	Strongly agree	5	Strongly agree	5	Strongly agree	5	Strongly agree	5	Somewhat agree	4	Strongly agree	5
31	Neither agree nor disagree	3	Strongly agree	5	Strongly agree	5	Strongly agree	5	Strongly agree	5	Strongly agree	5	Strongly agree	5	Strongly agree	5	Somewhat agree	4	Strongly agree	5
1	Somewhat agree	4	Strongly agree	5	Strongly agree	5	Somewhat agree	4	Strongly agree	5	Strongly agree	5	Strongly agree	5	Strongly agree	5	Somewhat agree	4	Strongly agree	5
7	Strongly agree	5	Strongly agree	5	Strongly agree	5	Strongly agree	5	Strongly agree	5	Strongly agree	5	Strongly agree	5	Strongly agree	5	Strongly agree	5	Somewhat agree	4
18	Strongly agree	5	Strongly agree	5	Strongly agree	5	Somewhat agree	4	Somewhat agree	4	Somewhat agree	4	Strongly agree	5	Strongly agree	5	Strongly agree	5	Strongly Disagree	1
22	Strongly agree	5	Strongly agree	5	Strongly agree	5	Strongly agree	5	Strongly agree	5	Strongly agree	5	Strongly agree	5	Strongly agree	5	Neither agree nor disagree	3	Somewhat agree	4
30	Strongly agree	5	Strongly agree	5	Strongly agree	5	Strongly agree	5	Strongly Disagree	1	Somewhat agree	4	Strongly agree	5	Strongly agree	5	Strongly agree	5	Strongly agree	5
21	Strongly agree	5	Strongly agree	5	Strongly agree	5	Strongly agree	5	Strongly agree	5	Strongly agree	5	Strongly agree	5	Strongly agree	5	Strongly agree	5	Strongly agree	5
33	Strongly Disagree	1	Somewhat agree	4	Strongly agree	5	Strongly agree	5	Neither agree nor disagree	3	Somewhat agree	4	Strongly agree	5	Strongly Disagree	1	Strongly agree	5	Somewhat agree	4
12	Strongly agree	5	Strongly agree	5	Strongly agree	5	Strongly agree	5	Strongly agree	5	Strongly agree	5	Strongly agree	5	Somewhat agree	4	Strongly agree	5	Strongly agree	5
15	Strongly agree	5	Strongly agree	5	Strongly agree	5	Strongly agree	5	Strongly agree	5	Strongly agree	5	Strongly agree	5	Strongly agree	5	Strongly agree	5	Strongly agree	5
17	Somewhat agree	4	Strongly agree	5	Strongly agree	5	Neither agree nor disagree	3	Neither agree nor disagree	3	Somewhat agree	4	Strongly agree	5	Strongly agree	5	Neither agree nor disagree	3	Strongly agree	5
13	Strongly Disagree	1	Strongly Disagree	1	Strongly agree	5	Strongly agree	5	Strongly agree	5	Strongly agree	5	Strongly agree	5	Somewhat agree	4	Strongly agree	5	Somewhat agree	4
24	Strongly agree	5	Strongly agree	5	Strongly agree	5	Somewhat agree	4	Somewhat disagree	2	Strongly agree	5	Strongly agree	5	Somewhat agree	4	Strongly agree	5	Somewhat disagree	2
38	Strongly agree	5	Somewhat agree	4	Strongly agree	5	Somewhat agree	4	Strongly agree	5	Strongly agree	5	Strongly agree	5	Strongly agree	5	Strongly agree	5	Neither agree nor disagree	3
34	Strongly agree	5	Strongly agree	5	Strongly agree	5	Strongly agree	5	Neither agree nor disagree	3	Somewhat agree	4	Strongly agree	5	Somewhat agree	4	Somewhat agree	4	Neither agree nor disagree	3
23	Strongly agree	5	Strongly agree	5	Somewhat agree	4	Somewhat agree	4	Neither agree nor disagree	3	Neither agree nor disagree	3	Somewhat agree	4	Strongly agree	5	Strongly agree	5	Neither agree nor disagree	3
25	Somewhat agree	4	Somewhat agree	4	Somewhat agree	4	Somewhat agree	4	Somewhat disagree	2	Somewhat agree	4	Somewhat agree	4	Strongly agree	5	Strongly agree	5	Somewhat disagree	2
27	Strongly agree	5	Strongly agree	5	Strongly agree	5	Strongly agree	5	Somewhat agree	4	Neither agree nor disagree	3	Somewhat agree	4	Strongly agree	5	Somewhat agree	4	Somewhat disagree	2
20	Strongly agree	5	Strongly agree	5	Strongly agree	5	Strongly agree	5	Strongly agree	5	Strongly agree	5	Strongly agree	5	Strongly agree	5	Strongly agree	5	Strongly agree	5
16	Somewhat agree	4	Somewhat agree	4	Strongly agree	5	Somewhat agree	4	Somewhat agree	4	Somewhat agree	4	Somewhat agree	4	Strongly agree	5	Somewhat agree	4	Somewhat agree	4
% Agreement (Either Somewhat or Strongly Agree)	87.5		93.8		96.9		93.8		65.6		90.6		96.9		93.8		93.8		71.9
Median	5		5		5		5		4		5		5		5		5		4.5
Mode	5		5		5		5		5		5		5		5		5		5
Mean	4.4375		4.625		4.875		4.59375		3.90625		4.53125		4.75		4.59375		4.59375		4.0625
Standard Deviation	1.21649		0.906962		0.421212		0.712079		1.2791		0.671271		0.508001		0.837021		0.614837		1.16224
